# Supplementary material
Source: Elsevier journal article supplement (https://www.sciencedirect.com/science/article/pii/S1695403319301821)
Supplement: mmc3 [file S1695403319301821:mmc3.docx]

**ANPEDIA-19-114**

**E-APPENDED**

**PROTOCOLO DE ESTUDIO Y TRATAMIENTO DE LA P.T.I. PTI-2018◊**

**Título abreviado:** PROTOCOLO DE ESTUDIO Y TRATAMIENTO DE LA P.T.I. PTI-2018

Emilio Monteagudoa*, Itziar Astigarragab, Áurea Cerverac, Mª Angeles Dasíd, Ana Sastree, Rubén Berruecof, José Luis Dapenag, en representación del Grupo de Trabajo de la PTI de la SEHOP

aServicio de Pediatría y sus Áreas Específicas. Hospital Infantil La Fe, Valencia,

bHospital de Cruces. Bilbao.

cHospital de Móstoles, Madrid

dHospital Infantil La Fe, Valencia

eHospital Infantil La Paz, Madrid

fHospital Sant Joan de Déu, Barcelona

gHospital Infantil Valle de Hebrón, Barcelona

**◊**Presentado y aprobado en el XI Congreso Nacional de la Sociedad Española de Hematología y Oncología Pediátricas, Alicante 31 de Mayo-2 de Junio de 2018.

*Correo electrónico: [emonteagudo@aehh.org](mailto:emonteagudo@aehh.org)

**RESUMEN**

La trombocitopenia inmune primaria, anteriormente conocida como púrpura trombocitopénica inmune, es una enfermedad cuyo manejo diagnóstico y terapéutico ha sido siempre controvertido. La Sociedad Española de Hematología y Oncología Pediátricas, a través del grupo de trabajo de la PTI, ha actualizado el documento con las recomendaciones protocolizadas para el diagnóstico y tratamiento de esta enfermedad, basándose en las guías clínicas disponibles actualmente, revisiones bibliográficas, ensayos clínicos y el consenso de sus miembros. El objetivo principal es disminuir la variabilidad clínica en los procedimientos diagnósticos y terapéuticos con el fin de obtener los mejores resultados clínicos, los mínimos efectos adversos y preservar la calidad de vida.

**Palabras clave:** PTI, púrpura trombocitopénica inmune, trombocitopenia inmune primaria, infancia

**PROTOCOL FOR THE STUDY AND TREATMENT OF Primary immune thrombocytopenia: PTI-2018◊**

**ABSTRACT**

Primary immune thrombocytopenia (ITP), formerly known as immune thrombocytopenic purpura, is a disease for which the clinical and therapeutic management has been always controversial. The ITP work group of the Spanish Society of Paediatric Haematology and Oncology has updated its guidelines for diagnosis and treatment of ITP in children, based on current guidelines, bibliographic review, clinical assays, and member consensus. The main objective is to reduce clinical variability in diagnostic and therapeutic procedures, in order to obtain best clinical results with minimal adverse events and good quality of life.

**Keywords:** ITP, immune thrombocytopenic purpura, primary immune thrombocytopenia, children

**ABREVIATURAS**

PTI: púrpura trombocitopénica inmune, trombocitopenia inmune primaria

SEHOP: Sociedad Española de Hematología y Oncología Pediátricas

TP: tiempo de protrombina

TTPA: tiempo de tromboplastina parcial activado

CMV: citomegalovirus

EBV: virus de Epstein Barr

VIH: virus de la inmunodeficiencia humana

IGIV: inmunoglobulinas intravenosas

Ig-anti D: inmunoglobulina anti D

**INTRODUCCIÓN**

La Trombocitopenia Inmune Primaria (PTI) es una enfermedad caracterizada por la presentación habitualmente aguda de una trombocitopenia esencialmente periférica con valores inferiores a 100.000 plaquetas/μL, en niños que carecen de antecedente u otra patología que explique dicha citopenia, con manifestaciones hemorrágicas exclusivamente (generalmente púrpura) o asintomáticos, que se debe a un mecanismo autoinmune(1) . La incidencia anual es de 1/10.000 niños con un pico entre los 2 y 4 años, no parece haber diferencias debidas al sexo. Suele existir antecedente de infección viral o vacunación 1-3 semanas antes.

El eje central en la etiopatogenia de la PTI es la pérdida de la tolerancia inmunológica hacia los antígenos específicos de las plaquetas. Inicialmente se documentó y estaba asentado el papel del brazo efector humoral (auto anticuerpos específicos) sobre las plaquetas en la patogénesis de la enfermedad, pero con el avance en los conocimientos de la inmunología y las aplicaciones al conocimiento de la PTI se ha observado la importancia que tiene la inmunidad celular de forma directa e indirecta a través de la cooperación T-B. Igualmente, siempre se ha considerado que la trombocitopenia era consecuencia de la destrucción periférica exclusiva de plaquetas, pero en la actualidad se cree que por lo menos en un porcentaje de casos existe afectación en la megacariocitopoyesis, lo que explicaría la ausencia de hiperplasia megacariocítica que se observa en algunos niños y la respuesta al tratamiento con análogos de la trombopoyetina.

En Marzo 2009 se publicaron las recomendaciones de estandarización de la terminología, definiciones y criterios de respuesta de la PTI para adultos y niños. Se elimina el término de púrpura porque el sangrado cutáneo o mucoso está ausente o es mínimo en algunos pacientes. Se mantiene el acrónimo ITP (Immune ThrombocytoPenia) y PTI en castellano, por su amplia difusión y utilización previa(1).

En este consenso también se establece el nivel de corte de la cifra de plaquetas en 100.000/μL para el diagnóstico de PTI, por los recuentos frecuentes entre 100.000 y 150.000/μL en individuos sanos y embarazadas. La clasificación se modifica atendiendo a la historia natural de la PTI en la infancia, en la que aproximadamente dos tercios se recuperan espontáneamente en los primeros 6 meses y la posibilidad de remisión es alta entre los 3 y 12 meses(2), e incluso puede ser más tardía.

Posteriormente, en enero 2010 se publicó el consenso internacional para el diagnóstico y manejo de la PTI(3). El diagnóstico sigue siendo de exclusión. El principal problema es el riesgo aumentado de hemorragia. No existe una correlación exacta entre la cifra de plaquetas y las manifestaciones hemorrágicas, aunque éstas son más frecuentes por debajo de 10.000/μL. La mayoría de los pacientes están asintomáticos o tienen petequias, hematomas o equimosis aislados en piel o mucosas(4, 5). Sin embargo, algunos casos pueden sufrir hemorragias más graves a nivel cutáneo, mucoso, gastrointestinal o incluso intracraneal (0,1-0,5%) (6-9).

En este nuevo protocolo hemos centrado el objetivo del tratamiento en tratar las hemorragias con relevancia clínica, no en corregir las cifras de plaquetas hasta valores normales. Hay que evitar tratamientos innecesarios, potencialmente tóxicos, en pacientes paucisintomáticos y conseguir una adecuada calidad de vida con la mínima toxicidad asociada a la terapia. El tratamiento de las PTI persistentes o crónicas es complejo y se plantean diferentes alternativas.

En este Protocolo se actualiza la versión del protocolo PTI-2010(10).

**OBJETIVOS**

Unificar criterios diagnósticos, protocolos de seguimiento y tratamiento de la PTI.

CLASIFICACION DIAGNÓSTICA, CRITERIOS DE EVALUACIÓN CLÍNICA Y RESPUESTA AL TRATAMIENTO

## Clasificación diagnóstica (1)

**PTI de reciente diagnóstico**

Desde el momento del diagnóstico hasta los 3 meses de evolución.

**PTI persistente**

De duración entre los 3 y 12 meses desde el diagnóstico, incluye a

- Pacientes que no alcanzan la remisión completa de forma espontánea
- Pacientes que no mantiene la remisión completa después de suspender el tratamiento instaurado.

**PTI crónica**

Pacientes que continúan con trombocitopenia después de 12 meses desde el diagnóstico.

## Criterios de evaluación clínica (10)

Ver tabla 1.

FACTORES DE RIESGO HEMORRÁGICO

Ver tabla 2.

## Criterios de respuesta al tratamiento (10)

Ver tabla 3.

EXPLORACIONES COMPLEMENTARIAS AL DIAGNÓSTICO

En todos los pacientes con trombocitopenia se debe realizar una historia clínica detallada y una exploración física completa que permitan descartar otras enfermedades hematológicas o situaciones que de forma secundaria puedan producir trombocitopenia .

Los estudios detallados a continuación en la tabla 4, son los recomendados por considerarse básicos (3, 10-12).

EXPLORACIONES ADICIONALES

Indicadas en pacientes en los que no remite espontáneamente o no responden al tratamiento. Se recomienda:

- Estudio morfológico de médula ósea por punción aspirativa si no se hizo previamente. Valorar la realización de biopsia, inmunofenotipo y citogenética para completar el estudio.
- Poblaciones linfocitarias.
- Anticuerpos antinucleares y opcionalmente otros estudios de autoinmunidad

RECOMENDACIONES GENERALES

Ver tabla 5.

PTI DE DIAGNÓSTICO RECIENTE

El paciente con PTI de diagnóstico reciente(1) puede presentar unas manifestaciones hemorrágicas de gravedad variable en general en función de la cifra de plaquetas, actividad habitual y presencia de otros factores que pueden influir en la hemostasia. Hay que valorar siempre el conjunto de datos clínicos y biológicos para un adecuado enfoque terapéutico. Se ha decidido clasificar a los pacientes en diversos grupos en función de las manifestaciones clínicas y factores de riesgo hemorrágico, con la finalidad de establecer la opción de tratamiento más adecuada(3, 10, 11, 14-19).

## Clasificación de pacientes y pauta de actuación (figura 1)

Pacientes con sangrado activo y recuento inferior a 30.000 plaquetas/ μL .

Se propone administrar 1 dosis de IGIV y nueva valoración a las 24 h.:

- si persiste el sangrado activo se añaden corticoides (prednisona o metilprednisolona) y/o una segunda dosis de IGIV
- si desaparece la clínica se vuelve a valorar a las 72 h. y,
  - si persiste la mejora clínica entonces pasa a observación
  - pero si aparece de nuevo sangrado activo, se inicia tratamiento con corticoides (prednisona o metilprednisolona) o se administra una segunda dosis de IGIV.

Si a pesar de lo anterior sigue con sangrado activo, se recomienda consultar con unidad especializada de Hematología Pediátrica la administración de Ig anti-D (en caso de ser Rh+) (17), bolus de corticoides o dexametasona a altas dosis VO (20).

Pacientes con sangrado cutáneo-mucoso o factores de riesgo.

Se propone administrar de entrada corticoides (prednisona o metilprednisolona). Si hay evolución clínica a hemorragia activa se administra 1 dosis de IGIV y se sigue como en el supuesto del grupo anterior.

Pacientes con sangrado cutáneo exclusivo.

Se propone una actitud expectante y controles periódicos con actuación posterior en función de la evolución.

PTI PERSISTENTE Y CRÓNICA

Los pacientes afectos de PTI crónica sintomáticos, que requieren el empleo secuencial o permanente de tratamiento deben ser controlados totalmente o de forma coordinada por centros con unidades especializadas de Hematología Pediátrica.

El paciente con PTI persistente y crónica puede presentar unas manifestaciones hemorrágicas de gravedad variable en general en función de la cifra de plaquetas, actividad habitual y presencia de otros factores que pueden influir en la hemostasia. Hay que valorar siempre el conjunto de datos clínicos y biológicos para un adecuado enfoque terapéutico y procurar que el paciente desarrolle una vida lo más cercana a la normalidad con los mínimos efectos adversos derivados del tratamiento (19, 21), en espera de que la enfermedad entre en remisión(3, 10, 11, 22, 23). Está extendido en la literatura y se ha considerado razonablemente segura para el desarrollo de una vida cotidiana normal, el mantenimiento de recuentos por encima de 30.000 plaquetas, por ello, se ha elegido como factor determinante en el análisis de decisión inicial. No obstante el estilo de vida, la actividad habitual, las manifestaciones clínicas y los factores de riesgo hemorrágico son también determinantes, fundamentalmente si se indica algún tipo de intervención.

## Clasificación de pacientes y pauta de actuación (figura 2)

Pacientes con más de 30.000 plaquetas/μL mantenidas de forma estable.

Se recomienda mantenerlos sólo con observación, con los controles necesarios a juicio del clínico.

Pacientes con menos de 30.000 plaquetas/μL

Para una orientación adecuada hemos de tener en cuenta la existencia de factores de riesgo ligados a su edad, actividad deportiva, entorno familiar y accesibilidad a la atención sanitaria. Aquellos que no presenten episodios de hemorragia activa o factores de riesgo hemorrágico, se aconseja mantenerlos exclusivamente en observación. En caso contrario se recomienda:

- en pacientes con PTI Persistente: en los episodios de sangrado administrar IGIV(3, 10, 11, 14, 15, 23), Ig anti-D(3, 15, 17), prednisona o dexametasona oral(24-27). Si a pesar de ello permanece con episodios de sangrado se aconseja remitir a centro especializado para revisión y valorar la administración de otros tratamientos.
- en pacientes con PTI Crónica con clínica mantenida, se recomienda en primera línea la administración de análogos de la trombopoyetina(28-36), reservando corticoides o IGIV para episodios hemorrágicos puntuales. Solamente ante el fracaso de lo anterior, se puede considerar tratamientos de segunda línea como la esplenectomía(3), rituximab(11, 22, 33, 37-39) y otras opciones de inmunosupresores como el micofenolato(33, 40, 41).

TRATAMIENTO DE LAS URGENCIAS CON RIESGO VITAL Y SITUACIONES CON RIESGO ESPECIAL

Ver tabla 6.

TRATAMIENTOS DE LA PTI

CORTICOTERAPIA

Los corticoides constituyen el tratamiento inicial clásico de la PTI.

- - 1. **posología**
- **prednisona vía oral o metilprednisolona vía i.v.**, repartida en tres dosis tras desayuno, comida y cena. Dosis: 4 mg/kg/día; (dosis máxima 180 mg/día) durante 4 días, luego pasar a 2 mg/kg durante 3 días y suspender.
  - - **“bolus” de corticoides:** metilprednisolona: 30 mg/kg/día, dosis máxima 1 gramo, 3 días**,** infusión en 2 horas. Requiere especial control de tensión arterial y glucosuria
    - **dexametasona oral:** 0,6 mg/kg/día en 1 dosis, máximo 40 mg, durante 4 días. Suele emplearse en ciclos mensuales.
    1. **toxicidad:** la toxicidad principal de los corticoides es la hiperglucemia y la hipertensión, alteraciones del humor y del sueño, en tratamientos prolongados también síndrome de Cushing, osteoporosis y afectación del crecimiento. Como inmunosupresores aumentan la susceptibilidad a las infecciones.

IGIV

- - 1. **posología**

0,8-1 g/kg/dosis única i.v. en perfusión continua, tiempo de infusión 6-8 horas, al inicio de la infusión la velocidad es más lenta; se recomienda seguir la pauta de velocidad de infusión indicada en cada preparado.

- - 1. **efectos adversos**
- anafilaxia, en pacientes con déficit de IgA: se recomienda tener preparado para uso inmediato el tratamiento específico y equipo de reanimación (adrenalina,.....)
- cefalea, náuseas, vómitos (se recomienda disminuir la velocidad de infusión)
- febrícula/fiebre
- hemólisis aloinmune
- meningitis aséptica

IG ANTI-D (pacientes Rh+)

- - 1. **mecanismo de acción**

Bloqueo de receptores Fc macrofágicos con hematíes recubiertos por Ac anti D

- - 1. **posología**

50-75 microgramos/kg/día, I.V. dosis única**.**

perfusión durante 1 hora diluido en suero fisiológico. Se recomienda premedicar con paracetamol.

- - 1. **efectos adversos y riesgos biológicos**

Anemia hemolítica inmune y puesto que es un hemoderivado no están exentas del riesgo de transmisión de enfermedades infecciosas. Se ha comprobado la transmisión de hepatitis C.

Se recomiendan los siguientes controles: Hb, Coombs directo, recuento reticulocitario y bilirrubina indirecta. Se aconseja no repetir dosis (a las 2-4 semanas) si presenta bilirrubina I. > 1,5 mg% y reticulocitos > 5% con subictericia o coluria, o descenso de Hb superior a 2 g

**AGONISTAS DEL RECEPTOR DE LA TROMBOPOYETINA**

Los análogos de la trombopoyetina, eltrombopag y romiplostim, son dos moléculas de diversa naturaleza, caracterizadas por su acción trombopoyética mediante estímulo del receptor correspondiente. Se han desarrollado los últimos años, con estudios que muestran evidencia de respuesta mantenida en un porcentaje alto de casos refractarios o dependientes de otros tratamientos (corticoides, inmunoglobulinas IV). Actualmente tienen indicación en ficha para tratamiento en PTI crónica en niños mayores de 1 año y adultos.

Su introducción ha supuesto una mejoría importante en la clínica y en la calidad de vida de los pacientes con un perfil de seguridad aceptable(22, 28, 29, 32, 36).

Su lugar en la terapéutica de la PTI crónica ha pasado a estar ubicado por delante de tratamientos que tienen un perfil de riesgos potencialmente mayor como la esplenectomía y el rituximab, más aún en niños, en los que por la historia natural conocemos casos de remisiones tardías de la enfermedad. Se ha observado en los estudios clínicos, que pacientes que son o se hacen no respondedores a uno u otro fármaco pueden mostrar respuesta con el otro.

Es conveniente la indicación y el control de su manejo por unidades pediátricas especializadas de Hematología Pediátrica.

**Mecanismo de acción**

*Romiplostim* es una proteína recombinante compuesta por dos dominios. Romiplostim estimula el crecimiento y la maduración de los megacariocitos mediante su unión al receptor Mpl de la misma manera que la TPOe, vía JAK2, STAT5, P38 MAPK y AKT

*Eltrombopag* es una pequeña molécula no peptídica, activa por vía oral, que se une a laporción transmembrana del receptor de la TPO en un sitio diferente al de la TPOe**.** Eltrombopag, al unirse al receptor, activa la vía de señalización JAK2/STAT estimulando la producción de plaquetas.

**Indicación**

Eltrombopag y Romiplostim están indicados en niños mayores de 1 año de edad afectos de PTI crónica que son refractarios a otros tratamientos de la PTI.

**Posología**

*Romiplostim.* Se administra por vía subcutánea una vez por semana

Dosis de inicio: 1 μg/kg/s.

Ajuste de dosis: Incremento de 1 μg/kg semanalmente hasta que se alcance un recuento plaquetar >50 x109/L, sin exceder la dosis máxima de 10 μg/kg/s.

La mediana de dosis semanal necesaria del fármaco viene a ser de 5 μg/kg. La máxima respuesta se alcanza a las dos semanas de la primera dosis.

Si la cifra de plaquetas en dos semanas consecutivas es >150 x109/L, debe bajarse la dosis en 1 μg/kg. Si la cifra de plaquetas es >250 x 109/L, debe suspenderse el tratamiento temporalmente, para volver a iniciarlo con una dosis inferior en 1μg/kg cuando la cifra de plaquetas sea <150 x 109/L.

Hay que evaluar los recuentos plaquetarios semanalmente hasta alcanzar un recuento estable. Luego mensualmente

*Eltrombopag*

Administración vía oral, una vez al día

Dosis de inicio:

Niños de 1- 5 años: 25 mg/d

Niños de 6-17 años: 50 mg/d

En pacientes de ascendencia del este asiático o aquellos que presenten un daño hepático de moderado a severo: 12,5- 25 mg/d

Ajuste de dosis: Si a las dos semanas de iniciado el tratamiento, el recuento plaquetar es < 50 x109/L. se aumenta la dosis 12,5 mg/d (en <6 años) o 25 mg/d (en ≥ 6 años). Debe esperarse al menos 2 semanas antes de realizar un nuevo ajuste de dosis, de igual manera, hasta conseguir > 50 x109/L, sin sobrepasar la dosis máxima 75 mg/d

Para facilitar su absorción, Eltrombopag debe tomarse con el estómago vacío y como además quela cationes polivalentes, hay que considerar que, 4 horas previas a su administración y las dos horas posteriores, se debe evitar la toma de antiácidos, calcio (derivados lácteos..) o suplementos que contengan hierro, magnesio, selenio, zinc, aluminio. La falta de esta precaución es causa frecuente de no respuesta al tratamiento.

**Respuesta**

Ambos han demostrado ser eficaces incrementando los recuentos de plaquetas en alrededor del 80% de pacientes diagnosticados de PTI refractarios a otros tratamientos, aunque la respuesta suele ser estable con mínimos cambios de dosis en la mitad de los casos.

Hay varios estudios que demuestran la eficacia y la seguridad en la utilización de un segundo AR-TPO cuando el primero ha fallado.

A pesar de que estos fármacos presentan un inicio rápido del efecto terapéutico (1-2 semanas), el recuento plaquetario suele caer a las 2 semanas de la interrupción del tratamiento, de manera que deben ser administrados de forma continuada con la consiguiente elevación del coste, sin olvidar la falta de experiencia en su seguridad a largo plazo. Se van comunicado casos, en los que se ha podido retirar el el AR-TPO manteniéndose estable el recuento de plaquetas.

**Interrupción del tratamiento**

Debe interrumpirse su administración si tras cuatro semanas de tratamiento a las dosis máximas (Romiplostim:10 μg/kg/semana y 75: mg/d eltrombopag), el recuento plaquetario no aumenta hasta un nivel suficiente que evite hemorragias clínicamente relevantes.

**Efectos adversos**

Los acontecimientos adversos más frecuentes descritos en los pacientes tratados son leves, predominando la cefalea e infección respiratoria superior.

En el caso de Eltrombopag se ha observado aumento de transaminasas y bilirrubina, (reversible tras la retirada del fármaco) por lo que debe monitorizarse su determinación antes de iniciar el tratamiento, cada dos semanas durante el ajuste de la dosis y mensualmente en pacientes con recuentos estables de plaquetas

En ambos agonistas se han descrito efectos adversos poco frecuentes como el aumento de reticulina en la médula ósea (reversible tras la retirada del fármaco), complicaciones trombóticas (más en adultos, aunque también hay algún caso pediátrico) por lo que se debe tener precaución cuando se administren a pacientes con factores de riesgo conocidos de tromboembolismo, así como la rara posibilidad de progresión de neoplasias hematológicas y síndrome mielodisplasico.

También se han comunicado 2 casos de cataratas que llevaban tratamiento concomitante con eltrombopag y corticoides y otros dos casos que desarrollaron anticuerpos anti romiplostim sin reacción cruzada con la TPO endógena.

**ESPLENECTOMÍA**

- - 1. **Indicaciones**

PTI de diagnóstico reciente o persistente: ante urgencia hemorrágica con riesgo vital que no responde a tratamiento previo

PTI crónica:

- ante urgencia hemorrágica con riesgo vital
- valorar en mayores de 5 años, sintomáticos, refractarios a tratamientos previos, que presenta interferencia con su vida normal, con más de dos años de evolución
  - 1. **Profilaxis y manejo de la infección en el paciente esplenectomizado**
- profilaxis:
  - vacunación antineumocóccica, antimeningocóccica y frente a hemofilus
  - penicilina oral diaria ó amoxicilina: hasta un mínimo de dos años tras la intervención
- tratamiento de la infección: ante síndrome febril sin foco iniciar antibioterapia con cobertura para neumococo, hemofilus y meningococo

MICOFENOLATO DE MOFETILO.

Su experiencia en la PTI en Pediatría es limitada, aunque puede resultar eficaz en pacientes con formas menos graves de trombocitopenia inmune crónica o en cuadros de citopenia inmune (síndrome de Evans o síndrome linfoproliferativo autoinmune). La dosis recomendada es de 20-40 mg/kg/día, repartido en dos dosis. La tasa de respuesta global puede llegar hasta un 50-60%, con un tiempo de respuesta entre 4-6 semanas. Es bien tolerado, y los principales efectos secundarios son cefalea y molestias gastrointestinales(33, 40, 41).

**RITUXIMAB. ANTICUERPO MONOCLONAL ANTI-CD20**

Ha sido empleado en adultos y también en niños, aunque en estos últimos existe menos experiencia(33, 37, 42). Se obtiene una tasa de respuesta entre el 30 y 60% en función del tiempo de análisis. Su infusión requiere la vigilancia de problemas inmunoalérgicos agudos ocasionalmente graves. Existe riesgo infeccioso por depleción prolongada de linfocitos B y actualmente sigue bajo vigilancia por la descripción de cuadros de leucoencefalopatía multifocal progresiva, comunicada tras la administración en otras enfermedades(43). Su administración debe indicarse por uso compasivo, al no estar incluida esta indicación en ficha técnica.

**CONFLICTO DE INTERESES**

Emilio Monteagudo; Asistencia a Advisory Board de Amgen

Itziar Astigarraga; Asistencia al Advisory Board de Nplate-Amgen

Áurea Cervera; Asistencia a 2 Advisory Boards de Nplate-Amgen. Honorarios de Novartis por ponencia en reunión de PTI

Mª Angeles Dasí; Asistencia a Advisory Board de Revolade – Novartis. Asistencia al Advisory Board de Nplate-Amgen

Ana Sastre; Asistencia a Advisory Board de Revolade – Novartis. Asistencia al Advisory Board de Nplate-Amgen. Participación en programa de formación online sobre PTI pediátrica patrocinado por Novartis. Participación como ponente en diversas reuniones formativas patrocinadas por Novartis

Rubén Berrueco; Asistencia a Advisory Board de Revolade – Novartis. Participación en programa de formación online sobre PTI pediátrica patrocinado por Novartis.

José Luis Dapena; Asistencia a Advisory Board de Revolade – Novartis. Participación en programa de formación online sobre PTI pediátrica patrocinado por Novartis. Asistencia al Advisory Board de Nplate-Amgen

**BIBLIOGRAFÍA**

1. Rodeghiero F, Stasi R, Gernsheimer T, Michel M, Provan D, Arnold DM, et al. Standardization of terminology, definitions and outcome criteria in immune thrombocytopenic purpura of adults and children: report from an international working group. Blood. 2009;113(11):2386-93.

2. Heitink-Polle KMJ, Uiterwaal C, Porcelijn L, Tamminga RYJ, Smiers FJ, van Woerden NL, et al. Intravenous immunoglobulin vs observation in childhood immune thrombocytopenia: a randomized controlled trial. Blood. 2018;132(9):883-91.

3. Provan D, Stasi R, Newland AC, Blanchette VS, Bolton-Maggs P, Bussel JB, et al. International consensus report on the investigation and management of primary immune thrombocytopenia. Blood. 2010;115(2):168-86.

4. Kühne T, Imbach P, Bolton-Maggs PH, Berchtold W, Blanchette V, Buchanan GR, et al. Newly diagnosed idiopathic thrombocytopenic purpura in childhood: an observational study. Lancet. 2001;358(9299):2122-5.

5. Kühne T, Buchanan GR, Zimmerman S, Michaels LA, Kohan R, Berchtold W, et al. A prospective comparative study of 2540 infants and children with newly diagnosed idiopathic thrombocytopenic purpura (ITP) from the Intercontinental Childhood ITP Study Group. J Pediatr. 2003;143(5):605-8.

6. Iyori H, Bessho F, Ookawa H, Konishi S, Shirahata A, Miyazaki S, et al. Intracranial hemorrhage in children with immune thrombocytopenic purpura. Japanese Study Group on childhood ITP. Ann Hematol. 2000;79(12):691-5.

7. Elalfy M, Elbarbary N, Khaddah N, Abdelwahab M, El Rashidy F, Hassab H, et al. Intracranial hemorrhage in acute and chronic childhood immune thrombocytopenic purpura over a ten-year period: an Egyptian multicenter study. Acta Haematol. 2010;123(1):59-63.

8. Butros LJ, Bussel JB. Intracranial hemorrhage in immune thrombocytopenic purpura: a retrospective analysis. J Pediatr Hematol Oncol. 2003;25(8):660-4.

9. Neunert CE, Buchanan GR, Imbach P, Bolton-Maggs PHB, Bennett CM, Neufeld EJ, et al. Severe hemorrhage in children with newly diagnosed immune thrombocytopenic purpura. Blood. 2008;112(10):4003-8.

10. Monteagudo E, Fernández-Delgado R, Sastre A, Toll T, Llort A, Molina J, et al. [Protocol for the study and treatment of immune thrombocytopenic purpura (ITP). ITP-2010]. An Pediatr (Barc). 2011;74(6):414.e1-8.

11. Neunert C, Lim W, Crowther M, Cohen A, Solberg L, Crowther MA, et al. The American Society of Hematology 2011 evidence-based practice guideline for immune thrombocytopenia. Blood. 2011;117(16):4190-207.

12. Anoop P. Decision to perform bone marrow aspiration in immune thrombocytopenic purpura must be based on evidence. Pediatric Hematology and Oncology. 2009;25:91-2.

13. Mayer B, Salama A. Successful treatment of bleeding with tranexamic acid in a series of 12 patients with immune thrombocytopenia. Vox Sanguinis. 2017;112(8):767-72.

14. Blanchette VS, Luke B, Andrew M, Sommerville-Nielsen S, Barnard D, de Veber B, et al. A prospective, randomized trial of high-dose intravenous immune globulin G therapy, oral prednisone therapy, and no therapy in childhood acute immune thrombocytopenic purpura. J Pediatr. 1993;123(6):989-95.

15. Blanchette V, Imbach P, Andrew M, Adams M, McMillan J, Wang E, et al. Randomised trial of intravenous immunoglobulin G, intravenous anti-D, and oral prednisone in childhood acute immune thrombocytopenic purpura. Lancet. 1994;344(8924):703-7.

16. Tarantino MD, Young G, Bertolone SJ, Kalinyak KA, Shafer FE, Kulkarni R, et al. Single dose of anti-D immune globulin at 75 microg/kg is as effective as intravenous immune globulin at rapidly raising the platelet count in newly diagnosed immune thrombocytopenic purpura in children. J Pediatr. 2006;148(4):489-94.

17. Despotovic JM, Lambert MP, Herman JH, Gernsheimer TB, McCrae KR, Tarantino MD, et al. RhIG for the treatment of immune thrombocytopenia: consensus and controversy (CME). Transfusion. 2012;52(5):1126-36; quiz 5.

18. Carcao MD, Zipursky A, Butchart S, Leaker M, Blanchette VS. Short-course oral prednisone therapy in children presenting with acute immune thrombocytopenic purpura (ITP). Acta Paediatr Suppl. 1998;424:71-4.

19. Blanchette V, Bolton-Maggs P. Childhood immune thrombocytopenic purpura: diagnosis and management. Hematol Oncol Clin North Am. 2010;24(1):249-73.

20. Wali YA, Al Lamki Z, Shah W, Zacharia M, Hassan A. Pulsed high-dose dexamethasone therapy in children with chronic idiopathic thrombocytopenic purpura. Pediatr Hematol Oncol. 2002;19(5):329-35.

21. Bolton-Maggs PHB, Kok VSL. Chronic immune thrombocytopenic purpura-who needs medication? Ann Hematol. 2010;89 Suppl 1:61-5.

22. Grace RF, Despotovic JM, Bennett CM, Bussel JB, Neier M, Neunert C, et al. Physician decision making in selection of second-line treatments in immune thrombocytopenia in children. Am J Hematol. 2018;93(7):882-8.

23. George JN, Woolf SH, Raskob GE, Wasser JS, Aledort LM, Ballem PJ, et al. Idiopathic thrombocytopenic purpura: a practice guideline developed by explicit methods for the American Society of Hematology. Blood. 1996;88(1):3-40.

24. Adams DM, Kinney TR, O'Branski-Rupp E, Ware RE. High-dose oral dexamethasone therapy for chronic childhood idiopathic thrombocytopenic purpura. J Pediatr. 1996;128(2):281-3.

25. Borgna-Pignatti C, Rugolotto S, Nobili B, Amendola G, De Stefano P, Maccario R, et al. A trial of high-dose dexamethasone therapy for chronic idiopathic thrombocytopenic purpura in childhood. J Pediatr. 1997;130(1):13-6.

26. Chen JS, Wu JM, Chen YJ, Yeh TF. Pulsed high-dose dexamethasone therapy in children with chronic idiopathic thrombocytopenic purpura. J Pediatr Hematol Oncol. 1997;19(6):526-9.

27. Hedlund-Treutiger I, Henter J-I, Elinder G. Randomized study of IVIg and high-dose dexamethasone therapy for children with chronic idiopathic thrombocytopenic purpura. J Pediatr Hematol Oncol. 2003;25(2):139-44.

28. Tarantino MD, Bussel JB, Blanchette VS, Despotovic J, Bennett C, Raj A, et al. Romiplostim in children with immune thrombocytopenia: a phase 3, randomised, double-blind, placebo-controlled study. Lancet. 2016;388(10039):45-54.

29. Mathias SD, Li X, Eisen M, Carpenter N, Crosby RD, Blanchette VS. A Phase 3, Randomized, Double-Blind, Placebo-Controlled Study to Determine the Effect of Romiplostim on Health-Related Quality of Life in Children with Primary Immune Thrombocytopenia and Associated Burden in Their Parents. Pediatr Blood Cancer. 2016;63(7):1232-7.

30. Kuter DJ, Rummel M, Boccia R, Macik BG, Pabinger I, Selleslag D, et al. Romiplostim or standard of care in patients with immune thrombocytopenia. N Engl J Med. 2010;363(20):1889-99.

31. Kuter DJ, Bussel JB, Lyons RM, Pullarkat V, Gernsheimer TB, Senecal FM, et al. Efficacy of romiplostim in patients with chronic immune thrombocytopenic purpura: a double-blind randomised controlled trial. Lancet. 2008;371(9610):395-403.

32. Grainger JD, Locatelli F, Chotsampancharoen T, Donyush E, Pongtanakul B, Komvilaisak P, et al. Eltrombopag for children with chronic immune thrombocytopenia (PETIT2): a randomised, multicentre, placebo-controlled trial. Lancet. 2015;386(10004):1649-58.

33. Grace RF, Neunert C. Second-line therapies in immune thrombocytopenia. Hematology Am Soc Hematol Educ Program. 2016;2016(1):698-706.

34. George JN, Mathias SD, Go RS, Guo M, Henry DH, Lyons R, et al. Improved quality of life for romiplostim-treated patients with chronic immune thrombocytopenic purpura: results from two randomized, placebo-controlled trials. Br J Haematol. 2009;144(3):409-15.

35. Bussel JB, Provan D, Shamsi T, Cheng G, Psaila B, Kovaleva L, et al. Effect of eltrombopag on platelet counts and bleeding during treatment of chronic idiopathic thrombocytopenic purpura: a randomised, double-blind, placebo-controlled trial. Lancet. 2009;373(9664):641-8.

36. Bussel JB, de Miguel PG, Despotovic JM, Grainger JD, Sevilla J, Blanchette VS, et al. Eltrombopag for the treatment of children with persistent and chronic immune thrombocytopenia (PETIT): a randomised, multicentre, placebo-controlled study. Lancet Haematol. 2015;2(8):e315-25.

37. Garcia-Chavez J, Majluf-Cruz A, Montiel-Cervantes L, Esparza MG-R, Vela-Ojeda J, Mexican Hematology Study Group. Rituximab therapy for chronic and refractory immune thrombocytopenic purpura: a long-term follow-up analysis. Ann Hematol. 2007;86(12):871-7.

38. Bussel JB, Kuter DJ, Pullarkat V, Lyons RM, Guo M, Nichol JL. Safety and efficacy of long-term treatment with romiplostim in thrombocytopenic patients with chronic ITP. Blood. 2009;113(10):2161-71.

39. Bennett CM, Rogers ZR, Kinnamon DD, Bussel JB, Mahoney DH, Abshire TC, et al. Prospective phase 1/2 study of rituximab in childhood and adolescent chronic immune thrombocytopenic purpura. Blood. 2006;107(7):2639-42.

40. Provan D, Moss AJ, Newland AC, Bussel JB. Efficacy of mycophenolate mofetil as single-agent therapy for refractory immune thrombocytopenic purpura. Am J Hematol. 2006;81(1):19-25.

41. Olovi M, Suvajdzic N, Olovi N, Tomin D, Vidovi A, Palibrk V. Mycophenolate mophetil therapy for chronic immune thrombocytopenic purpura resistant to steroids, immunosuppressants, and/or splenectomy in adults. Platelets. 2011;22(2):153-6.

42. Parodi E, Rivetti E, Amendola G, Bisogno G, Calabrese R, Farruggia P, et al. Long-term follow-up analysis after rituximab therapy in children with refractory symptomatic ITP: identification of factors predictive of a sustained response. Br J Haematol. 2009;144(4):552-8.

43. Carson KR, Evens AM, Richey EA, Habermann TM, Focosi D, Seymour JF, et al. Progressive multifocal leukoencephalopathy after rituximab therapy in HIV-negative patients: a report of 57 cases from the Research on Adverse Drug Events and Reports project. Blood. 2009;113(20):4834-40.
